# Supplementary material for: Trichomonas tenax detected in pleural effusion fluid: A case report
Source: PubMed Central journal article supplement — Biomed Rep. 2024 Dec 10;22(2):31. doi: 10.3892/br.2024.1909 (PMC11668137; doi:10.3892/br.2024.1909), 2024-12-10

Figure S1. Chest CT and chest radiograph showing a right pleural effusion and a hydrothorax on the right side. (A) Chest CT on admission, showing a large piece of white lung on the right side with air bronchial sign and a large pneumothorax in the right pleural cavity. (B) Chest CT on admission, showing a right pleural effusion. (C) Chest radiography on admission, showing bilateral pneumonia and a hydrothorax on the right, with blurred right heart border. CT, computed tomography.

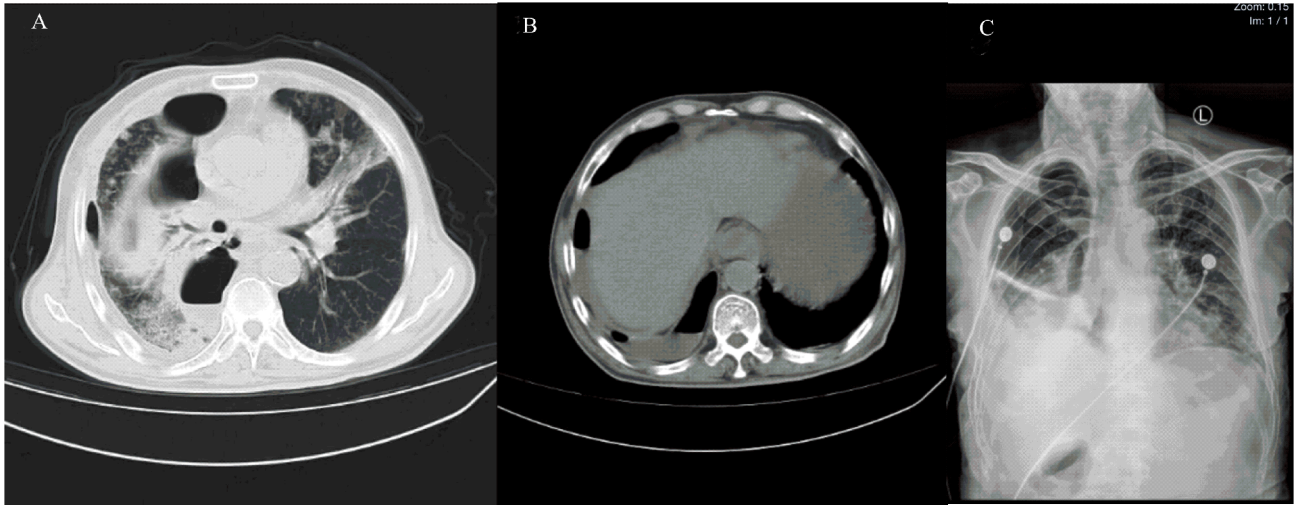

Supplement: Supplementary_Data1.pdf [file Supplementary_Data1.pdf]
