# Supplementary material for: Trichomonas tenax detected in pleural effusion fluid: A case report
Source: PubMed Central journal article supplement — Biomed Rep. 2024 Dec 10;22(2):31. doi: 10.3892/br.2024.1909 (PMC11668137; doi:10.3892/br.2024.1909), 2024-12-10
Supplement: Supplementary_Data3.pdf [file Supplementary_Data3.pdf]

**Supplementary data 1.**

Some worms shake in place, and the flagella shake quickly. Some swim directionally in the field of vision; some are slightly larger than white blood cells, and flagella can be seen.
